# Supplementary material
Source: PubMed Central journal article supplement (PMC6277513)
Supplement: mmc1.pdf [file mmc1.pdf]

YMTHE, Volume 26

## **Supplemental Information**

**4Mu Decreases CD47 Expression on Hepatic Cancer**

**Stem Cells and Primes a Potent Antitumor T Cell**

**Response Induced by Interleukin-12**

**Marcelo M. Rodríguez, Esteban Fiore, Juan Bayo, Catalina Atorrasagasti, Mariana García, Agostina Onorato, Luciana Domínguez, Mariana Malvicini, and Guillermo Mazzolini**

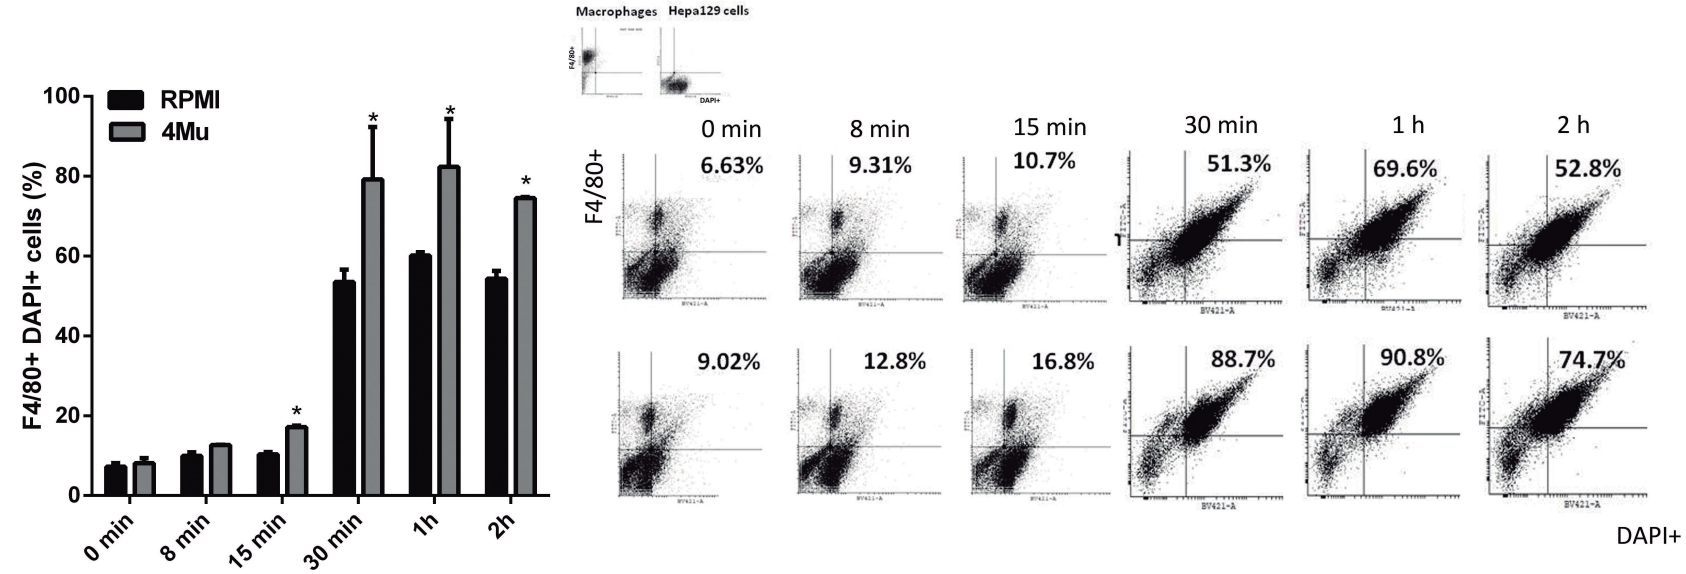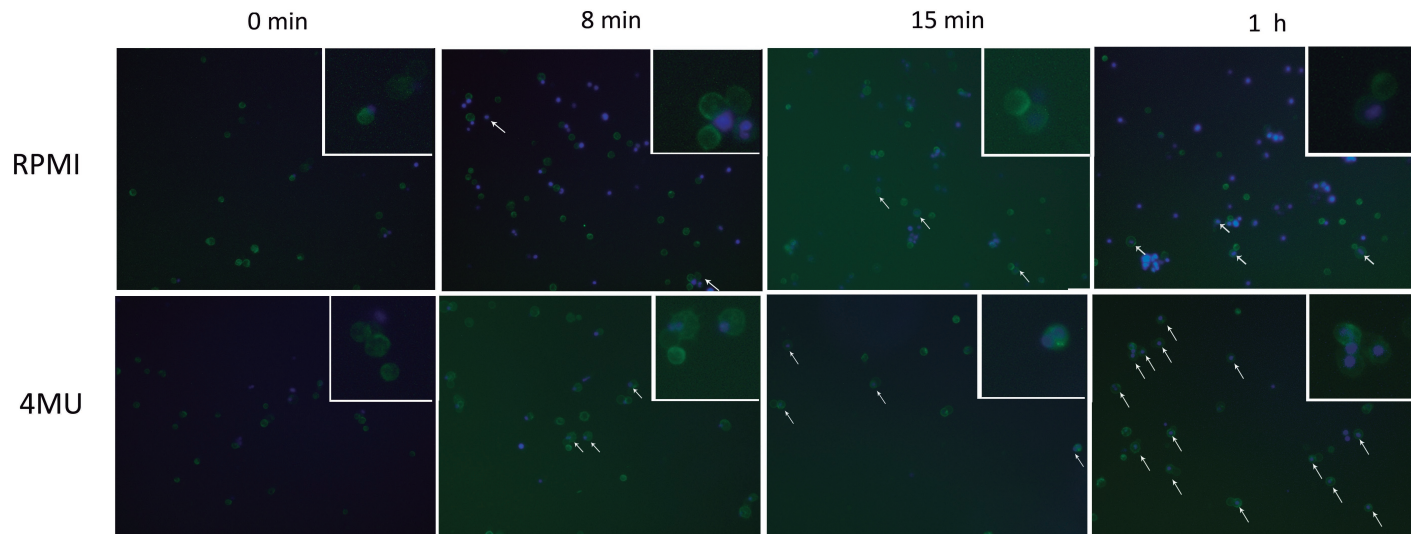

Hepa 1.6

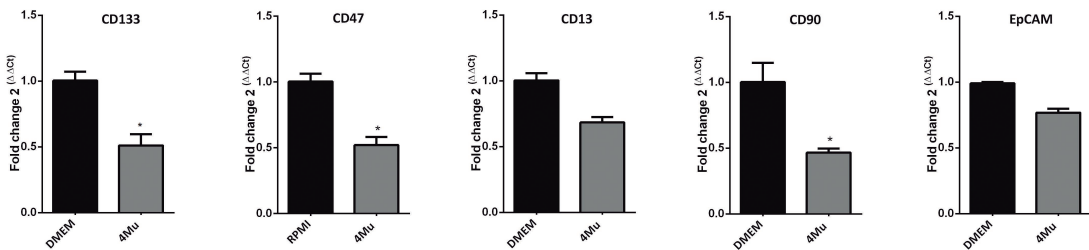

BNL

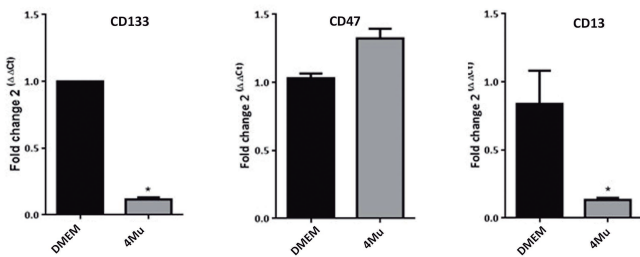

HuH7

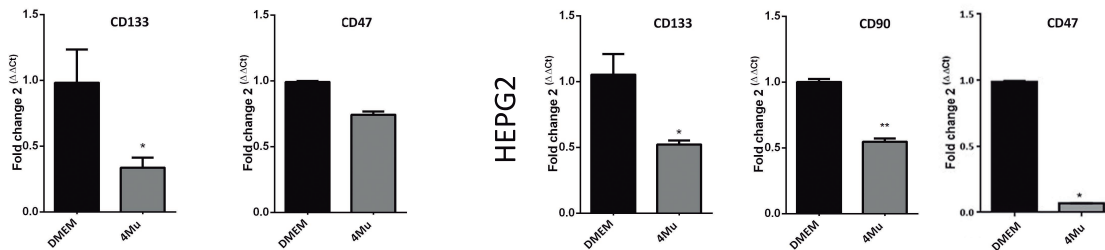

HEPG2

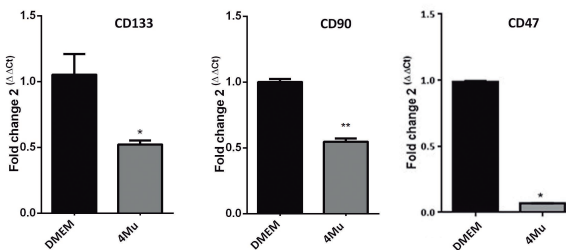

Figure S2

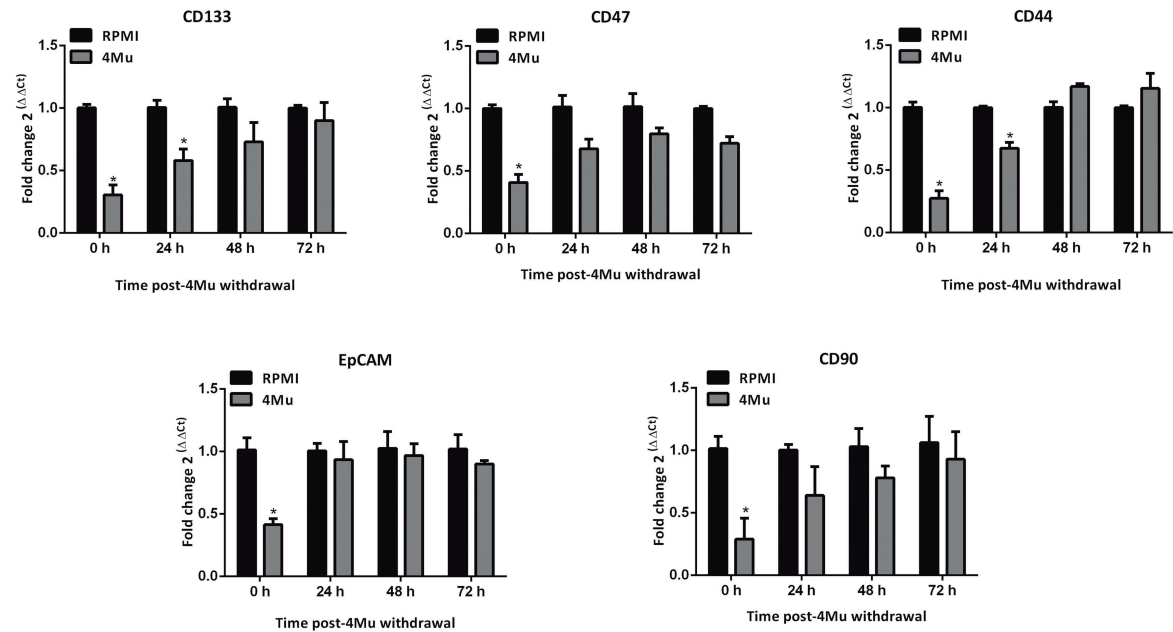

Figure S3

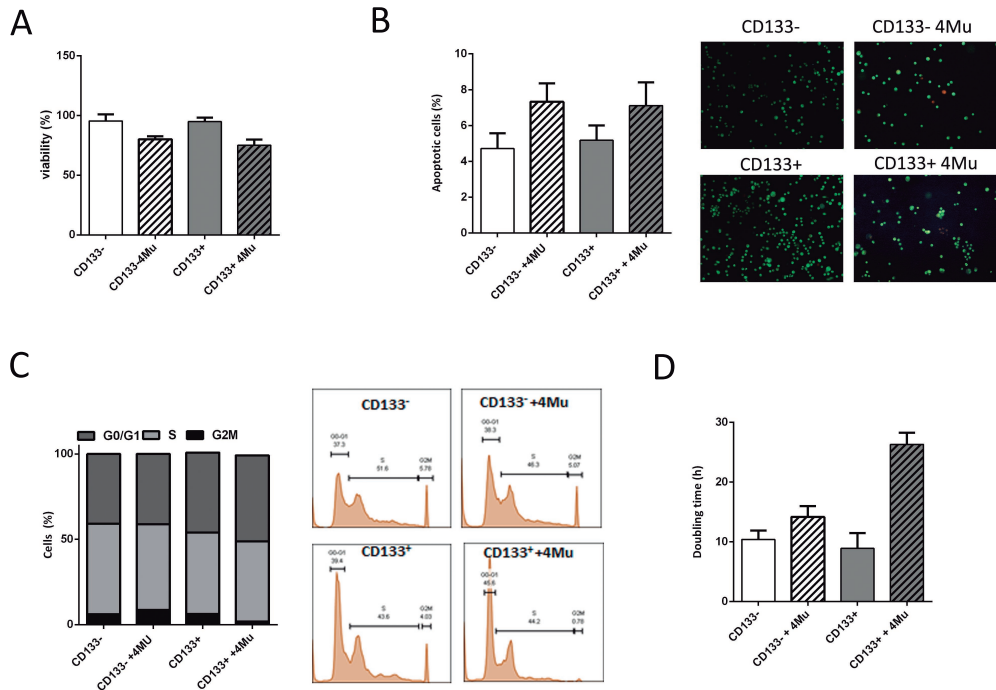

**Figure S4**

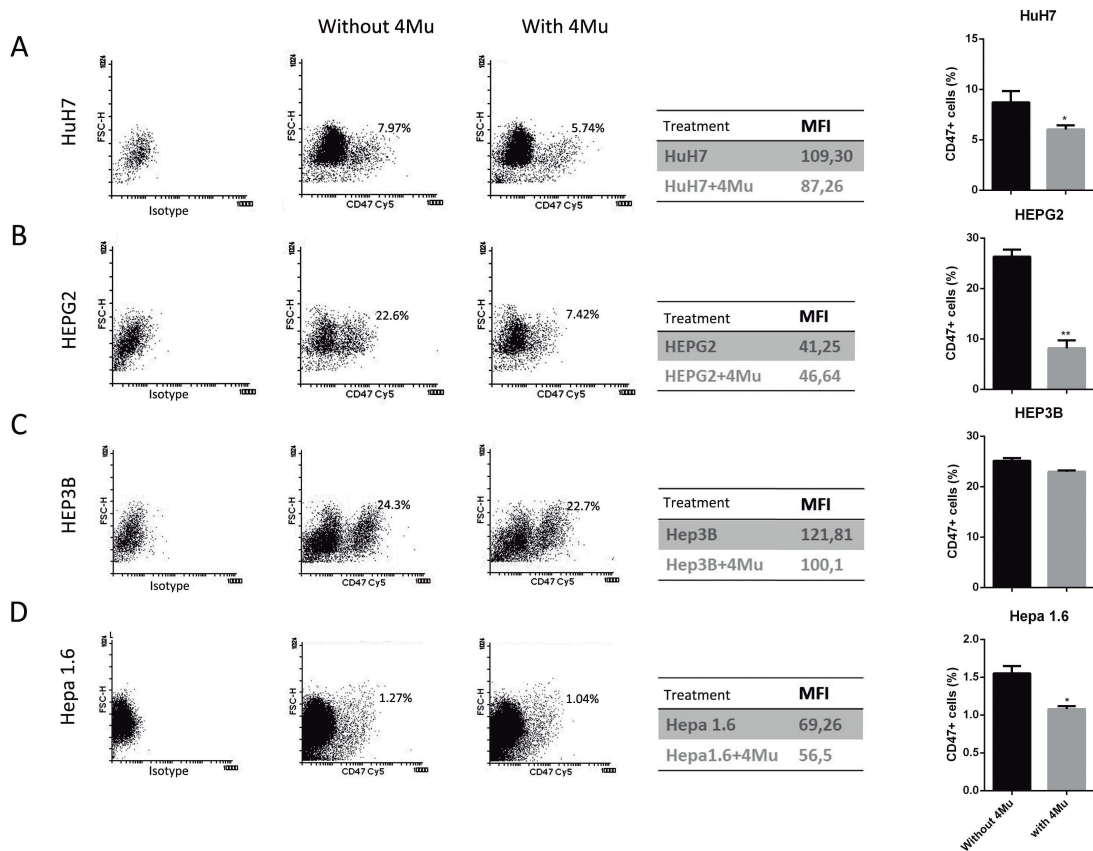

Figure S5

**Supplementary Figure 1. Kinetic of HCC cells phagocytosis.**

A) Hepa 129 cells untreated or treated with 0.5mM 4Mu were incubated with macrophages and analyzed by flow cytometry (F4/80+DAPI+) at different time points. \*  $p < 0.05$  4Mu vs. RPMI at 15min, 30 min, 1h and 2h after co-culture of Macrophages with Hepa129 cells. Two-way ANOVA, Sidak's multiple comparisons B) Dot plots for each assayed time. Small dot plot corresponds to control Hepa 129 cells (DAPI) or macrophages alone (F4/80+) test. C) Fluorescence microscopy analysis showed phagocytosis at early times.

**Supplementary Figure 2. Decreased mRNA levels of CSCs markers on murine and human HCC lines induced by treatment 4Mu *in vitro*.** CSC markers profile was determined in murine Hepa1.6 and BNL cells as well as in human HepG2 and HuH7 HCC cell lines. Real-time qPCR showed reduced mRNA levels of CD133, CD13, CD90, EpCAM and CD47 when HCC cells were exposed to 0.5mM 4Mu for 72h.

**Supplementary Figure 3. mRNA levels of CSCs markers on Hepa129 cells are restored after 4Mu withdrawn *in vitro*.** CSC markers profile was determined on murine Hepa129 cells by Real-time qPCR after 4Mu withdrawn. mRNA levels of CD133, CD44, CD90, EpCAM and CD47 were analyzed at 24, 48 and 72h post 4Mu withdrawal. CD133: \*  $p < 0.05$  RPMI vs. 4Mu at 0h and 24h; CD44: \*  $p < 0.05$  RPMI vs. 4Mu at 0 and 24h; CD90: \*  $p < 0.05$  RPMI vs. 4Mu at 0h and; EpCAM  $p < 0.05$  RPMI vs. 4Mu at 0h; CD47:  $p < 0.05$  RPMI vs. 4Mu at 0h and

**Supplementary Figure 4. 4Mu effects on Hepa 129 cells.** A) Hepa129 cell viability after 72 h of culture in presence of 0.5mM 4Mu determined by MTT assay. B) Cell cycle was assessed by flow cytometry on CD133+ and CD133- Hepa 129 cells at 72h: 4Mu halted CD133+ Hepa 129 cells at G0/G1, (\* $p < 0.05$  Kruskal-Wallis test). C) *In vitro* CD133+ and CD133- Hepa 129 cells apoptosis was assessed using acridin orange/ethidium bromide staining. D) CD133+Hepa 129 cells plus 4Mu showed a one and a half -fold increase in duplication time compared with CD133+/CD133- and CD133- plus 4Mu cells, statistically non significant (Kruskal-Wallis test).

**Supplementary Figure 5. CD47 expression levels in human and murine HCC cell lines.** A) HuH7; B) HepG2 and C) HEP3B human HCC cell lines or D) murine Hepa1.6

cells were cultured alone or with 0.5mM 4Mu for 72h; CD47 expression was measured by FACS. Representative data showing percentages of CD47+ in HCC cells and mean fluorescence intensity (MFI) was represented. HuH7 and HepG2 \*p<0.05; HEP3B \*\*p<0.01 and Hepa1.6 \*p<0.05 vs 4Mu (Mann-Whitney test)
